# Supplementary material for: Maternal and Placental Factors Associated with Stillbirth: Evidence from Selected Hospitals in Lusaka, Zambia
Source: Research Square preprint supplement (doi:10.21203/rs.3.rs-7425494/v1), 2025-10-01
Supplement: Supplementary file 1 [file 7f7b6060300224172c82d6ab.docx]

Maternal and Placental Factors Questionnaire – Field Version

| **Variable** | **Question / Response Options** | **Response** |
| --- | --- | --- |
| **Age** | Age of mother at last pregnancy | Count |
| **Maternal Weight** | Weight during pregnancy | Count |
| **Marital Status** | Are you married? | Married = 1; Not married = 0 |
| **Parity** | Number of births after 28 weeks | Count |
| **Employment Status** | Are you employed? | Employed = 1; Unemployed = 0 |
| **Education** | Highest level of education completed | Primary = 1; Secondary = 2; Tertiary = 3 |
| **Distance to Hospital** | Distance from home to nearest hospital | <5 km = 1; ≥5 km = 2 |
| **ANC Booking** | When did you first attend ANC? | <12 weeks = 1; ≥12 weeks = 2 |
| **ANC Contacts** | How many ANC visits did you have? | <8 = 1; ≥8 = 2 |
| **Folate/FeSO₄ Start** | When did you start folate/iron supplements? | <12 weeks = 1; ≥12 weeks = 2 |
| **History of Stillbirth** | Any previous stillbirths? | Yes = 1; No = 0 |
| **Interpregnancy Interval** | Time since last pregnancy | ≤2 years = 1; >2 years = 2 |
| **Planned Pregnancy** | Was this pregnancy planned? | Yes = 1; No = 0 |
| **HIV Status** | HIV result | Negative = 0; Positive = 1 |
| **Alcohol Use During Pregnancy** | Did you consume alcohol during pregnancy? | Yes = 1; No = 0 |
| **Anaemia During Pregnancy** | Were you diagnosed with anaemia? | Yes = 1; No = 0 |
| **Rhesus Factor** | Your Rhesus factor | Positive = 1; Not sure = 0 |
| **Preeclampsia** | Any preeclampsia in this pregnancy? | Yes = 1; No = 0 |
| **Hypertension** | History of hypertension in pregnancy | Yes = 1; No = 0 |
| **Congenital Anomalies** | Any congenital anomaly noted? | Present = 1; Absent = 0 |
| **Cord Insertion** | Umbilical cord insertion site | Central = 1; Marginal = 2 |
| **Placental Histopathology** | Placental findings (lab result) | Categorical |
