# Supplementary material for: Maternal and Placental Factors Associated with Stillbirth: Evidence from Selected Hospitals in Lusaka, Zambia
Source: Research Square preprint supplement (doi:10.21203/rs.3.rs-7425494/v1), 2025-10-01
Supplement: Supplementary file 2 [file 8bd6e3b87e004c4c56a2f54c.docx]

**PARTICIPANT INFORMATION SHEET**

**Title of the Research Study**

Maternal and Placental Factors Associated with Stillbirth: Evidence from Selected Hospitals in Lusaka, Zambia

**Principal Investigator**

Musonda Makasa, PhD in Epidemiology Candidate, School of Public Health, Department of Epidemiology and Biostatistics, University of Zambia.

Contact: +260 978888435

Email: mcmakasa@gmail.com

**Purpose and Background**

Stillbirth, which is the death of a baby before or during birth, remains a big challenge in Zambia and many other countries. It causes pain and distress for families and is also a concern for health services. In many cases, the exact causes of stillbirth are not well understood because information is missing or incomplete.

This study is being done to help us learn more about the main risk factors that may lead to stillbirth. By looking at information from hospital records, asking some questions, and examining the placenta in cases of stillbirth, we hope to better understand the reasons behind these losses. The knowledge we gain may help improve medical care for mothers and babies in the future and reduce the number of stillbirths.

**Procedures:**

Before starting the study, we will get approval from the ethics committees (UNZABREC and NHRA). If you agree to take part in the study, the following will happen:

1. **Review of Records**: We will look at information from your hospital file and records. If the information is not enough, we may ask you some questions. These questions will be about your health, background, and family situation.
2. **Placenta Examination**: If you agree, we will collect the placenta after delivery in cases of stillbirth. This does not involve any extra procedure for you, because the placenta is normally discarded after birth. The placenta will be placed in a clean container with only your study number (not your name) and sent to the laboratory. At the lab, a specialist doctor (pathologist) will carefully examine it to check for any problems that might explain the stillbirth. After the examination, the placenta will be stored safely for the time required by national health rules and later disposed of in a respectful and safe way.
3. **Routine Care**: You will continue to receive the normal medical care and treatment that the hospital provides.
4. **Confidentiality**: Your name and personal details will not appear on the study forms or samples. Instead, you will be given a study number so that all the information and samples remain confidential.
5. **No Financial Gain**: The information collected will only be used for research purposes and not for making money.

**Benefits**

 This study will help us understand how common stillbirth is, the main risk factors, and possible causes.

 Examining the placenta may help identify medical reasons for stillbirth, which could guide better care in the future.

**Risks**

The main possible risk is emotional distress when discussing sensitive issues. To reduce this, counselling will be offered before and after participation.

The collection of the placenta has no physical risk to you, since the placenta is normally thrown away after delivery. It will only be examined for research purposes and handled safely according to hospital rules.

**Reimbursements**

You will receive K5 as compensation for the time you spend taking part in this study.

**Confidentiality**

The findings of this study will be shared with you if you wish to know them. All information collected will be kept strictly confidential and used only for research purposes. Your identity will not be revealed in any reports or publications. Instead, a study number will be used to protect your privacy. Confidentiality will be maintained as far as the law allows.

**Injury clause**

If you experience emotional distress as a result of taking part in this study, counselling and support will be made available to you at the study site. The costs of such care will be covered by the researcher.

If you need more information, you may contact the Chairperson of the Research Ethics Committee, University of Zambia, School of Medicine, on telephone number 256067 or P.O. Box 50110, Ridgeway Campus, Lusaka.

**Questions**

**.............................................,** the researcher has discussed this information with you and offered to answer your questions. If you have further questions, you can contact him on 0977349386 or the Chairperson of Research Biomedical Ethics Committee at University of Zambia, School of Medicine on telephone 0211 256067.

**INFORMED CONSENT**

I confirm that I have understood the information I have been given about the study. I agree to participate in this study. I confirm that I am joining the study of my free will and I can withdraw at any time without affecting the care available to me. I understand what will be required of me.

Participant’s Signature......................................... Signed or thumb Print.................................

Date.................................................

Witness (Name and Signature)...............................................

Date**.......................................**

I confirm that I have explained the information fully and answered any questions.

Signed for the study team
